# Supplementary material for: Soil Bacterial Community Response to Differences in Agricultural Management along with Seasonal Changes in a Mediterranean Region
Source: PubMed Central journal article supplement (PMC4140800; doi:10.1371/journal.pone.0105515), 2014-08-21
Supplement: pone.0105515.s003.pdf [file pone.0105515.s003.pdf]

A)

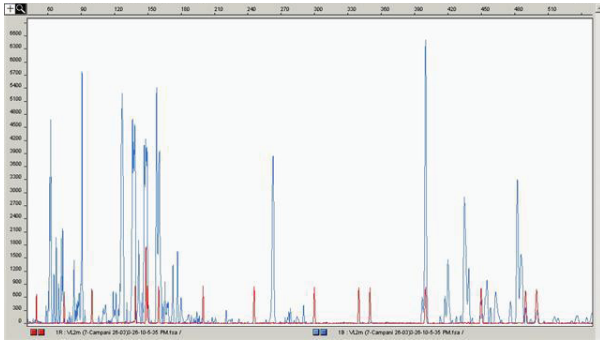

TV2

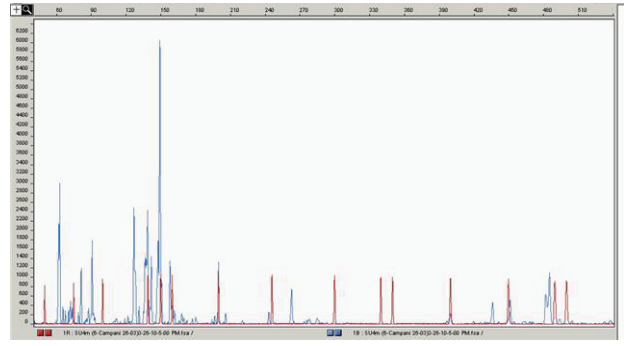

CO4

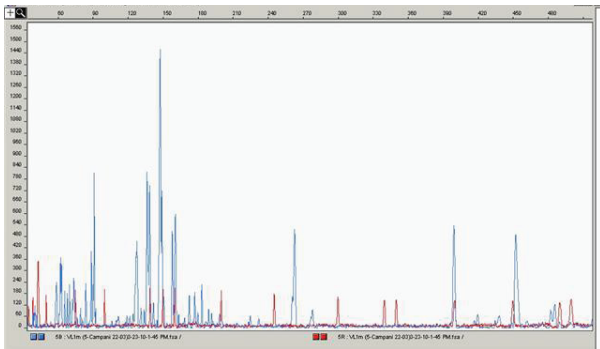

TV1

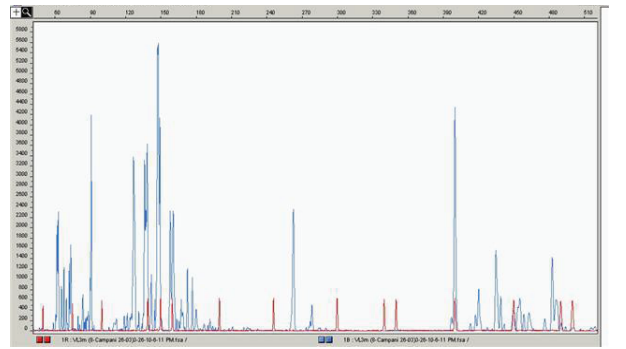

TV3

*MspI*

B)

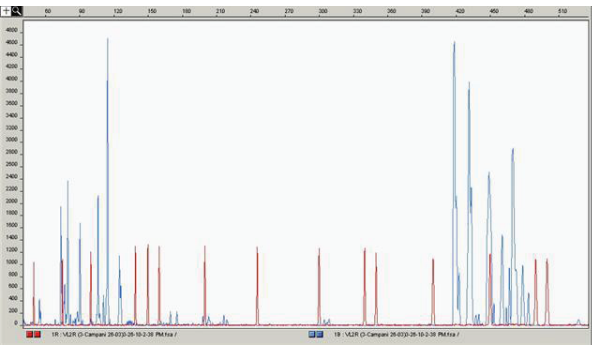

TV2

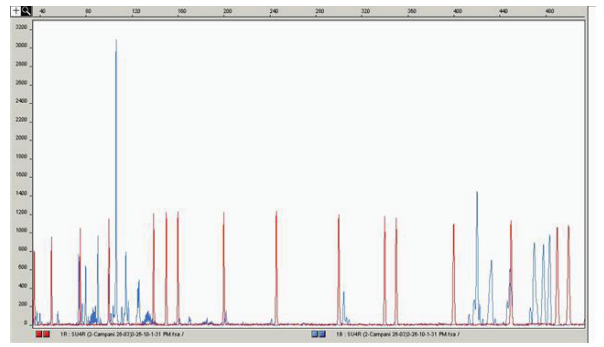

CO4

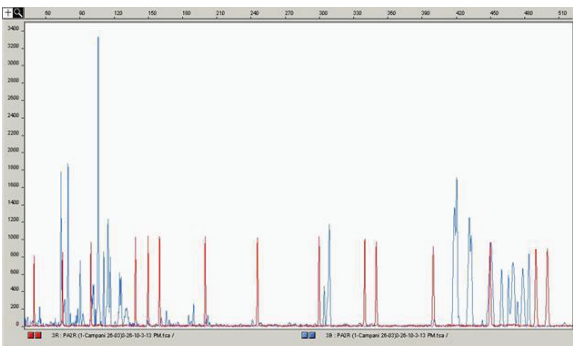

PA2

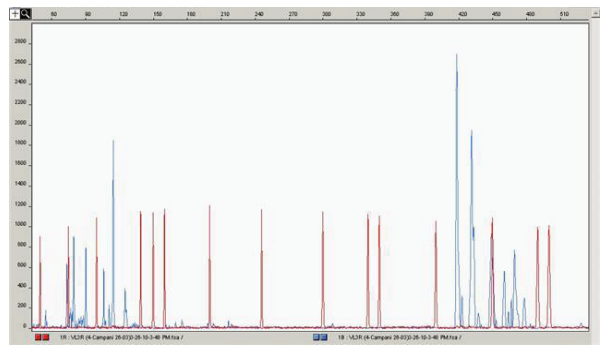

TV3

*RsaI*
